# Supplementary material for: How views of oncologists and haematologists impacts palliative care referral: a systematic review
Source: PubMed Central journal article supplement (PMC7686696; doi:10.1186/s12904-020-00671-5), 2020-11-23

**THEMATIC MAP OF REVIEW FINDINGS**

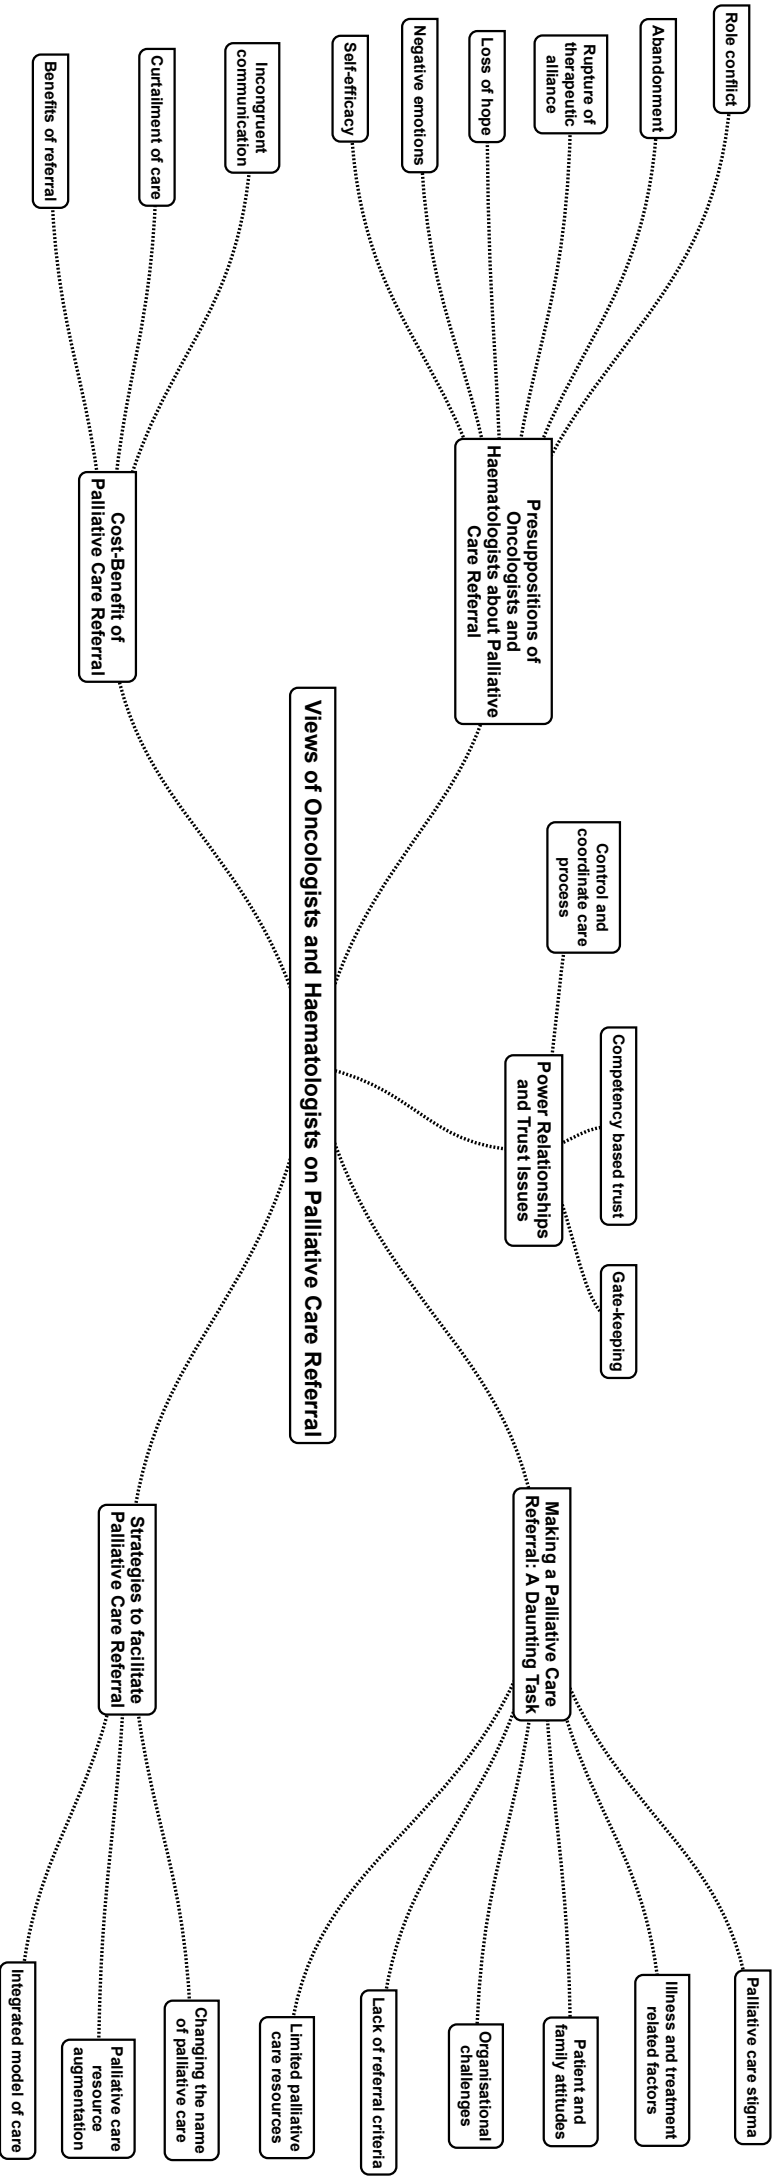

Supplement: 12904_2020_671_MOESM5_ESM.pdf [file 12904_2020_671_MOESM5_ESM.pdf]
